# Supplementary material
Source: publisher figshare collection journal article supplement (https://frontiersin.figshare.com/ndownloader/files/24088640)
Supplement: Supplementary file 1 [file 24088640]

Supplementary Material

## 1. Supplementary Figures


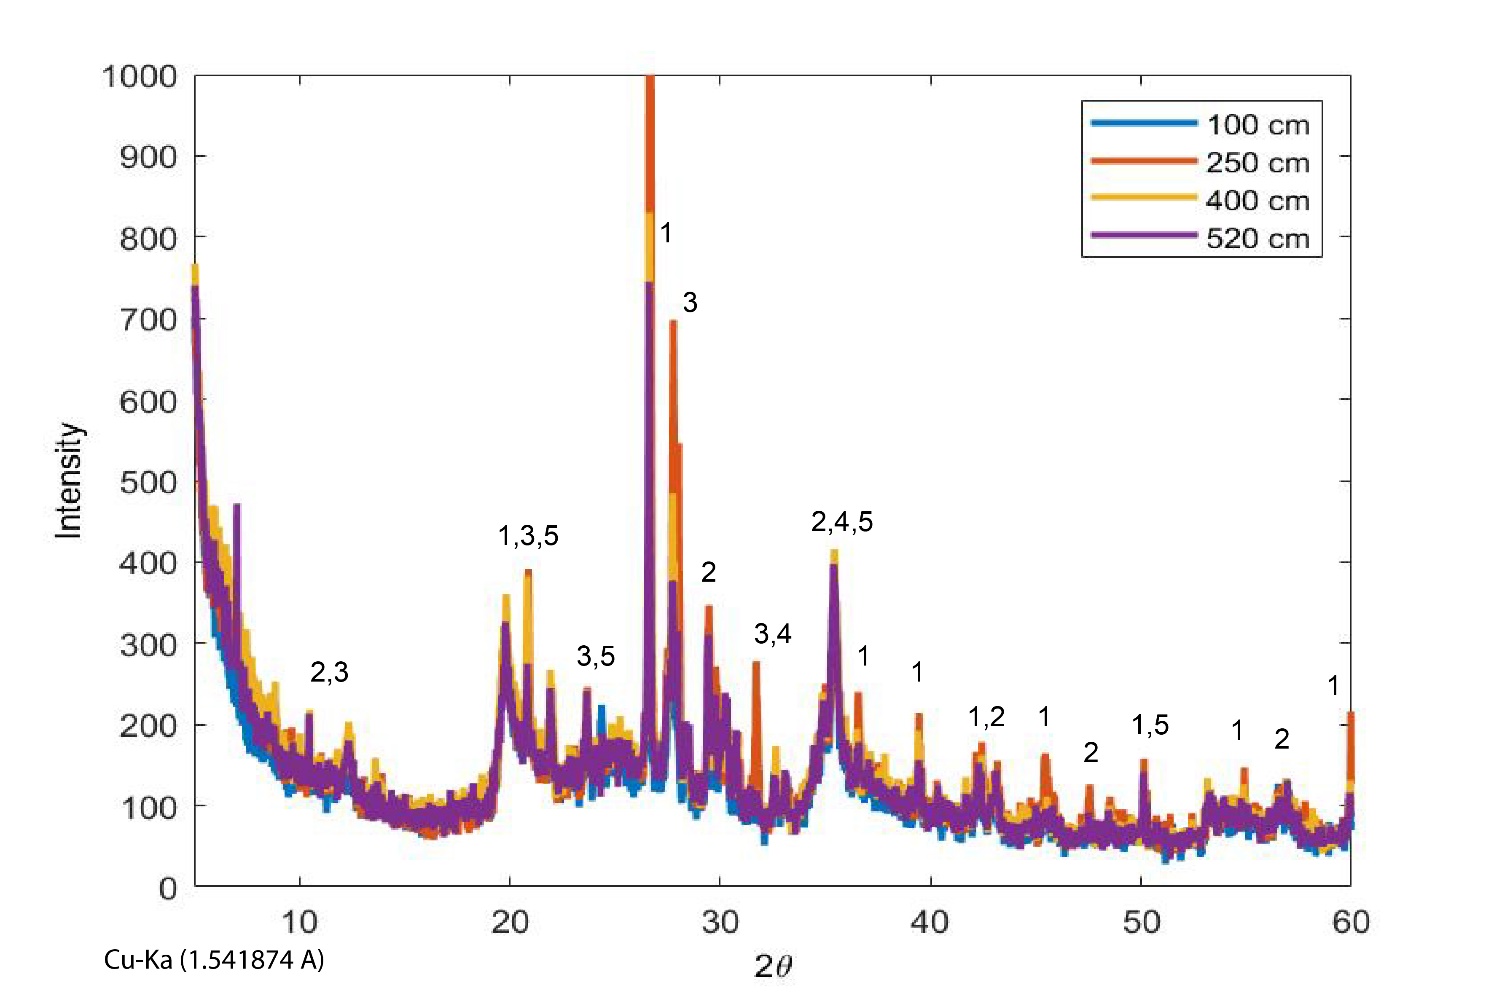


**Supplementary Figure 1.** XRD results of four representative samples from SG1 sediment core from depths: 100 cm (blue line), 250 cm (red line), 400 cm (orange line) and 520 cm (purple line). Results indicate the presence of quartz, calcite, clays and albite. 1- Quartz. 2- Calcite. 3- Albite. 4- Diopside. 5- Kaolinite.
